# Supplementary material
Source: PubMed Central journal article supplement (PMC1693844)

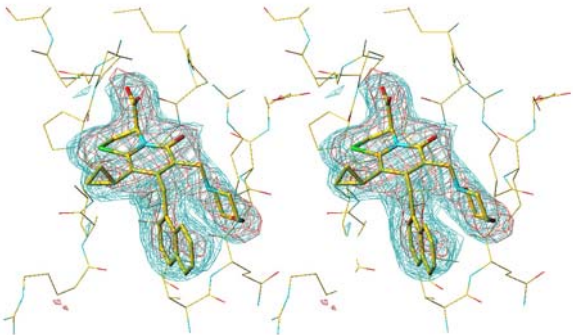

Supplement: pnas_0606795103_1.pdf [file pnas_0606795103_1.pdf]

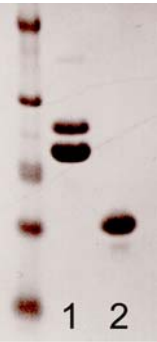

Supplement: pnas_0606795103_2.pdf [file pnas_0606795103_2.pdf]

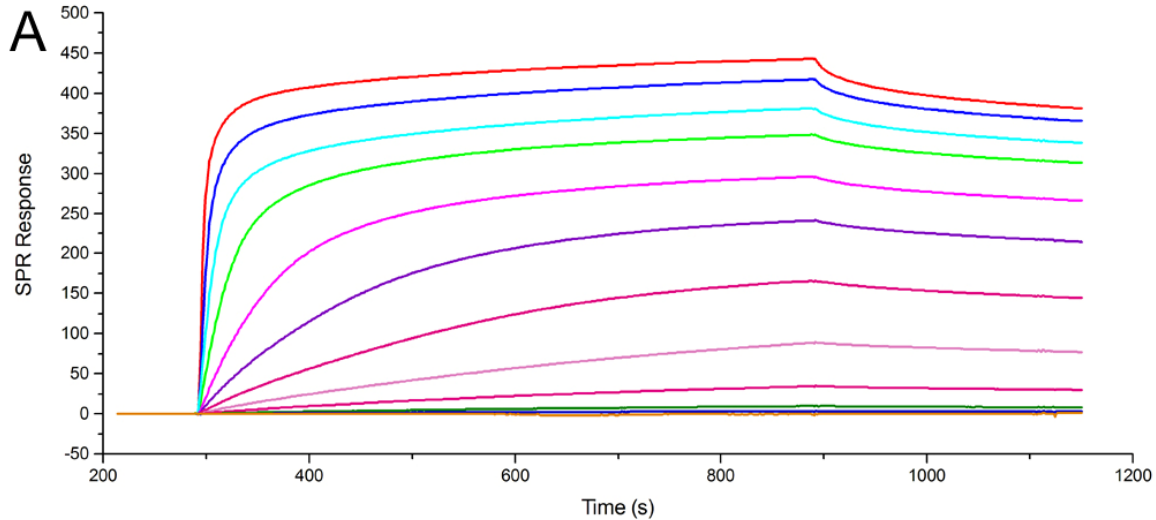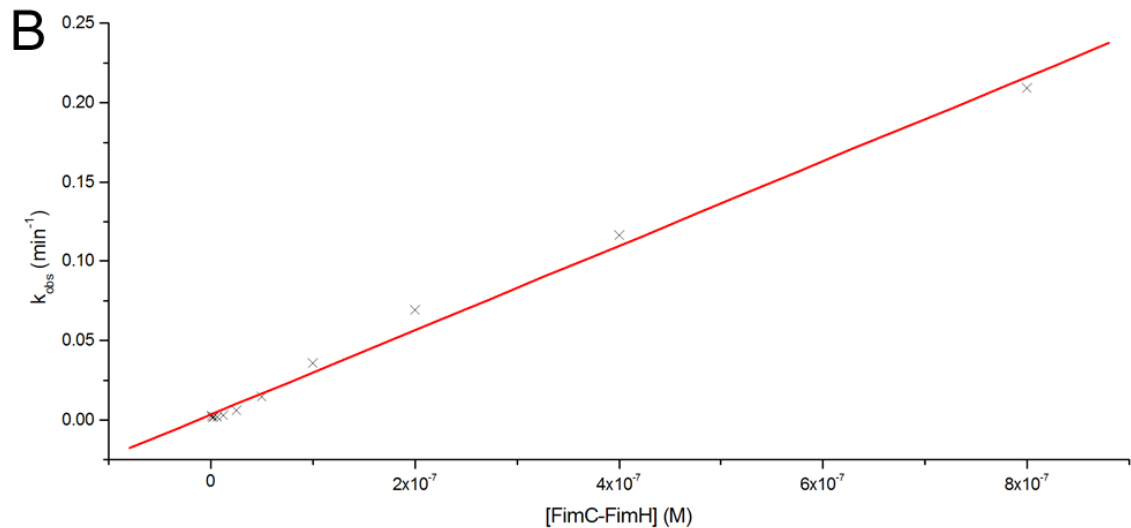

Supplement: pnas_0606795103_3.pdf [file pnas_0606795103_3.pdf]

Normal Chaperone-assisted Pilus assembly

Pilicide Inhibition of Pilus Assembly

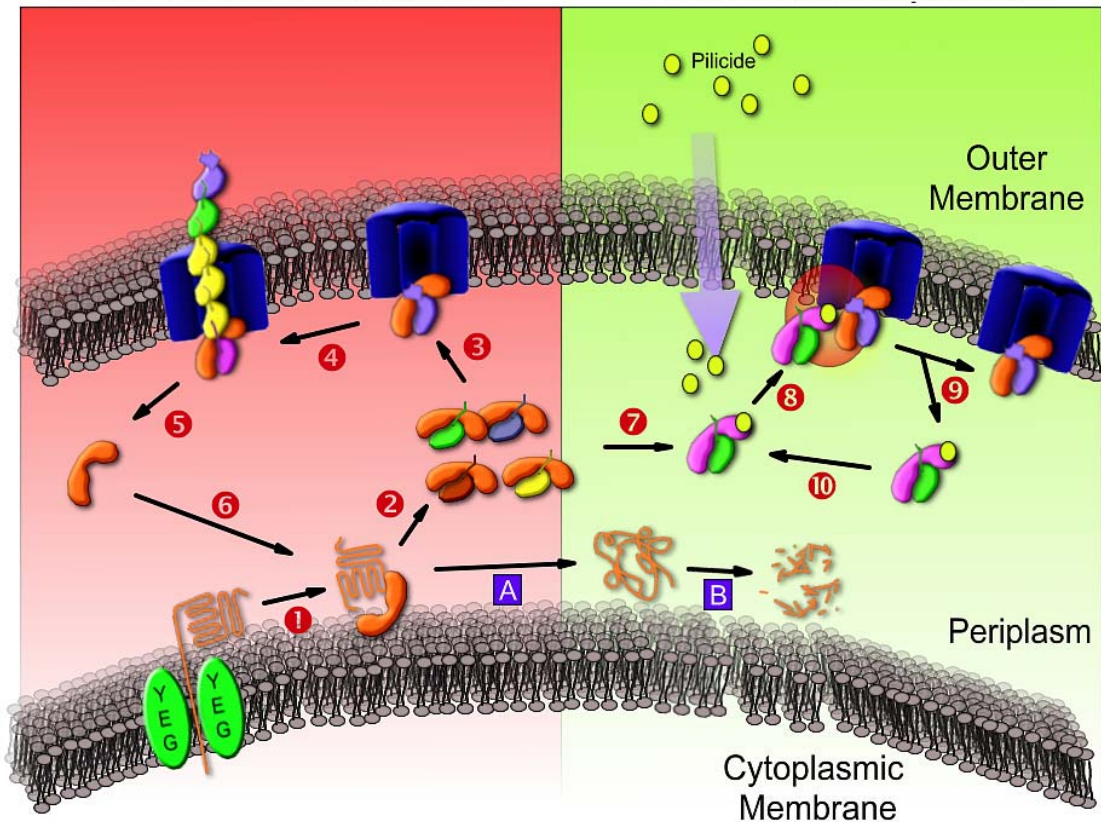

Supplement: pnas_0606795103_4.pdf [file pnas_0606795103_4.pdf]
